# Supplementary material
Source: PubMed Central journal article supplement (PMC3196379)
Supplement: NIHMS319643-supplement-1.pdf [file NIHMS319643-supplement-1.pdf]

## SUPPLEMENTARY FIGURES

**Supplementary Figure 1** Histogram displaying the distribution of DNA barcode copy numbers for each virus library. 100,000 BB88 cells were infected by lentivirus that carried the corresponding barcode libraries. Cells were cultured for one week before harvesting. Barcodes were recovered from the cells and analyzed using high throughput sequencing. The sequencing result did not comprehensively cover the entire barcode libraries as most barcodes were sequenced with low copy numbers.

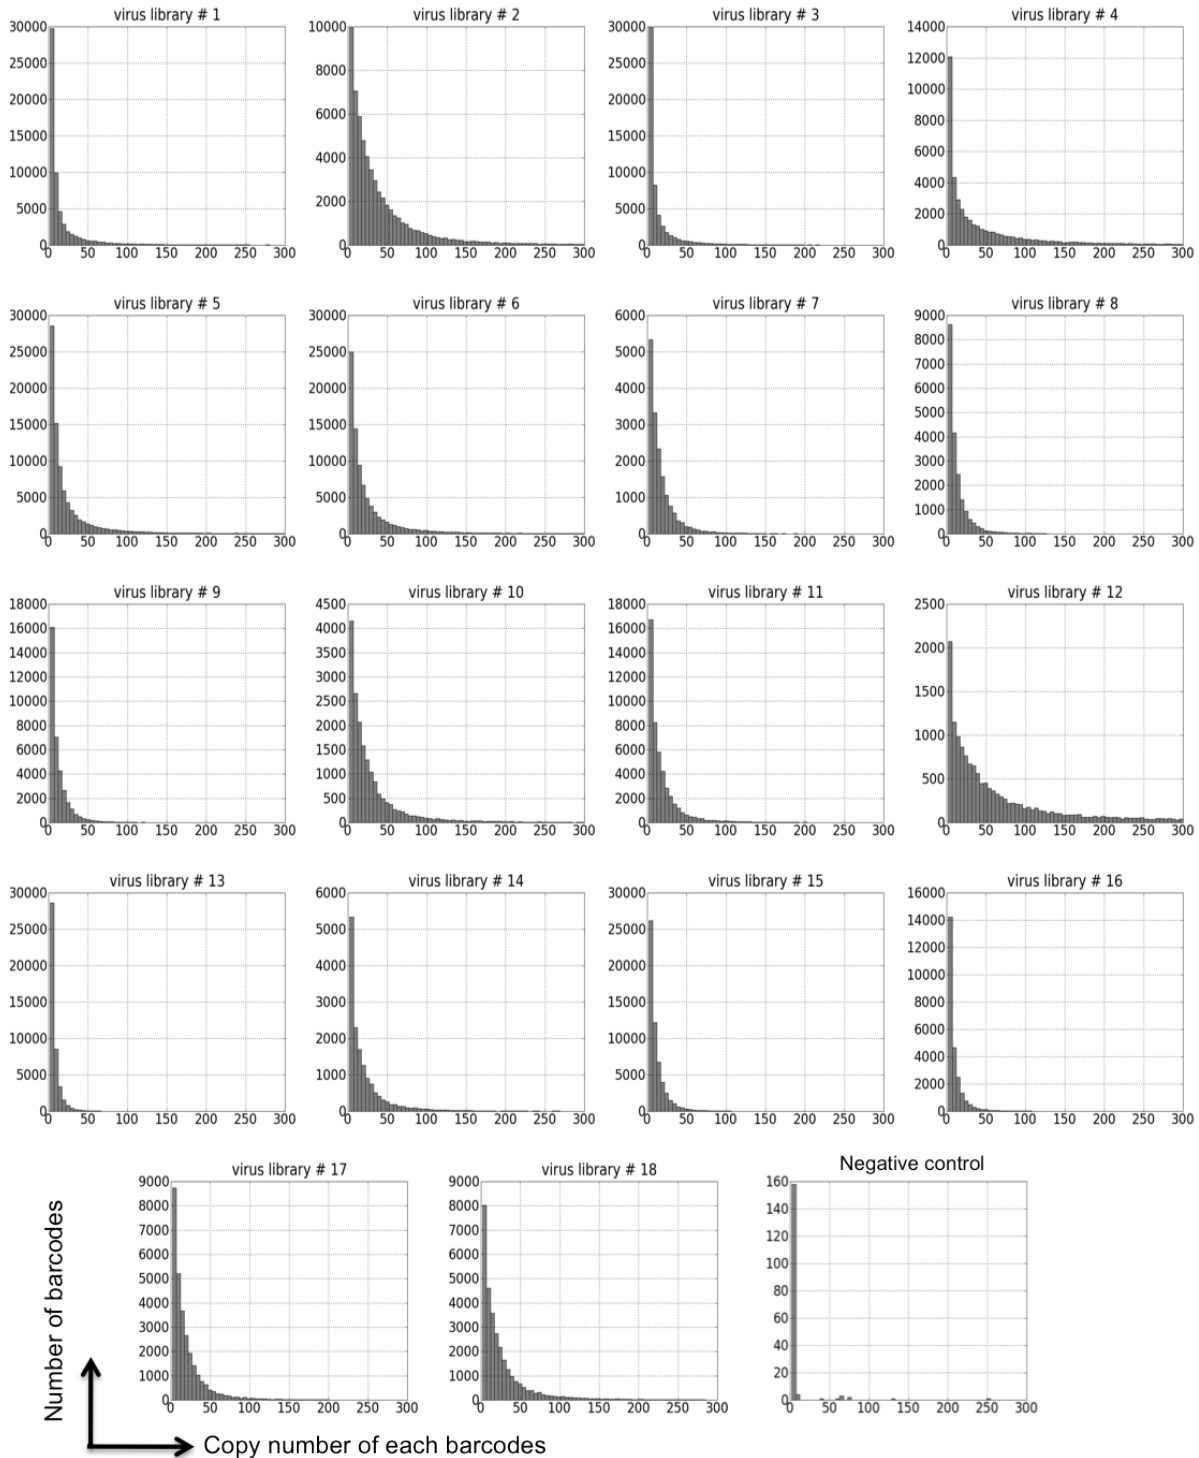

**Supplementary Figure 2** Gating for donor hematopoietic stem cells (lineage (CD3, CD4, CD8, B220, Gr1, Mac1, Ter119)-/cKit+/Sca1+/Flk2-/CD34-/CD150+) from cKit enriched bone marrow cells. Details for the cell preparation are described in Methods. Antibodies used are shown in Supplementary Table 3.

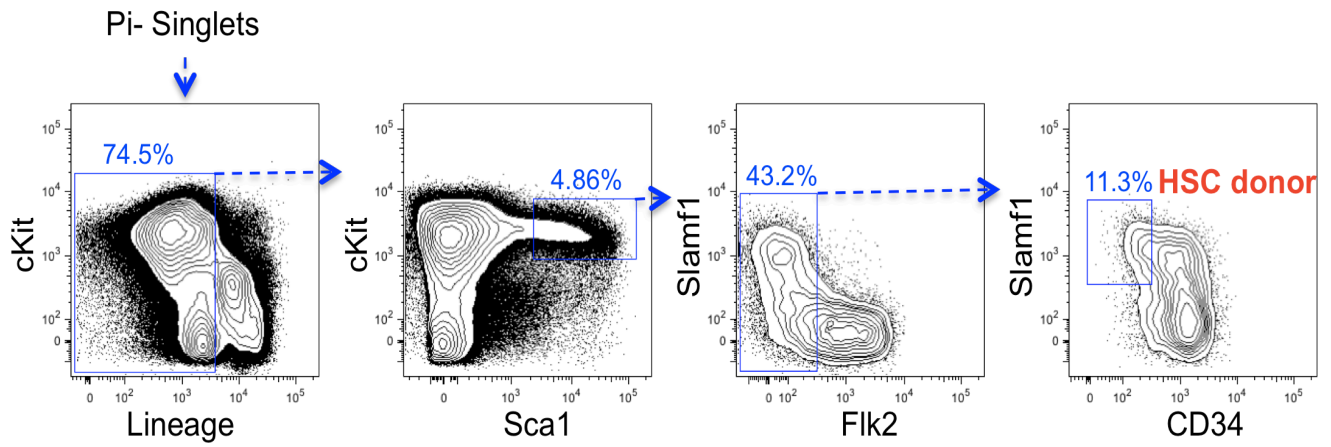

**Supplementary Figure 3** The barcode copy numbers per HSC clones (Fig. 2b) are fitted by a normal distribution. Experimental data is shown in blue and the fitted curve is shown in red.

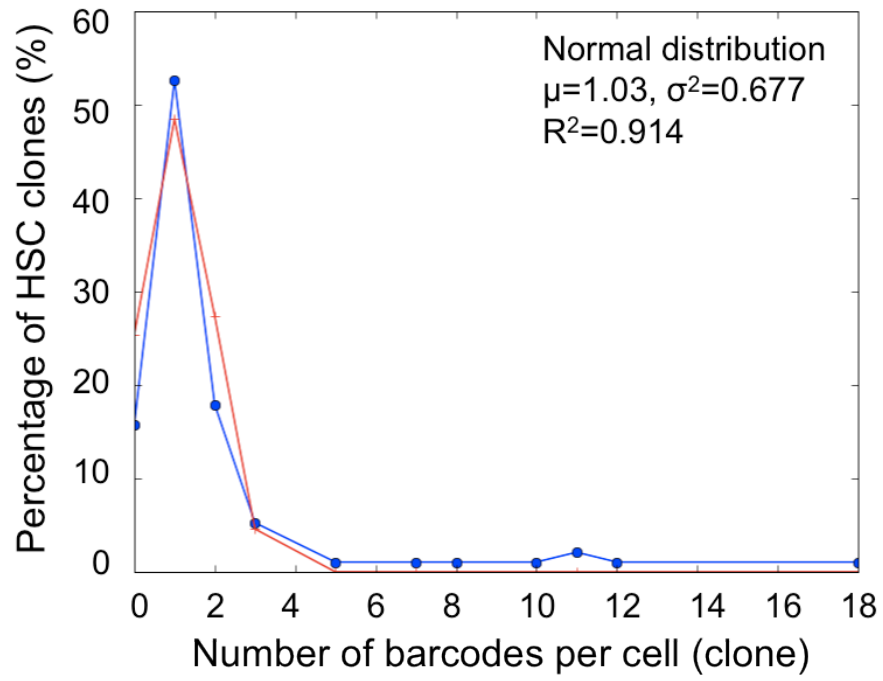

**Supplementary Figure 4** Histogram displaying the copy number distribution of background noise sequences when different numbers of misreads are allowed. All sequences with a common library ID are combined allowing for different numbers of misreads. Shown are the combined sequences with total copy number less than 1000, which represent the background noise sequences (Fig. 3). The copy number distribution of the background noise sequences changes when the number of allowed misreads increases from zero to one or more. This effect is particularly prominent at low copy numbers close to 0. However, the overall copy number distribution of the background noise remains similar even when more misreads are allowed. This suggests that while some of the background noise sequences arise from sequencing error, most of the noise may be attributed to other sources.

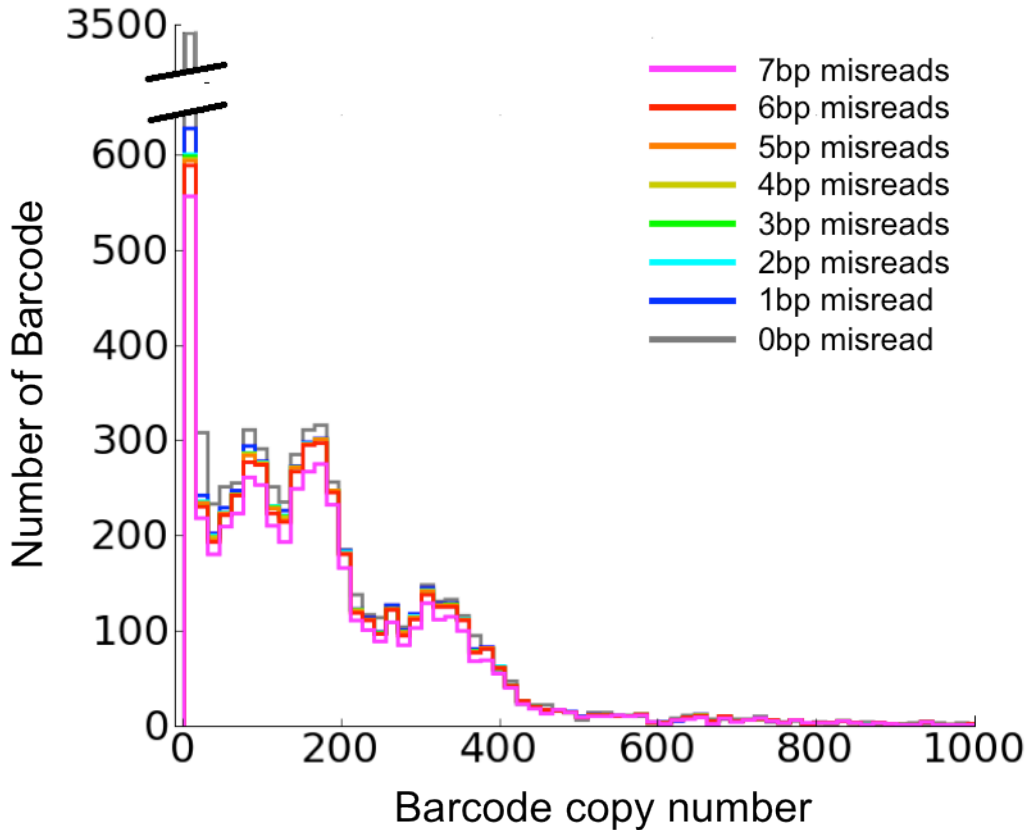

**Supplementary Figure 5** Gating for harvesting of mature blood cells. The four harvested blood cell populations are labeled in red. Red blood cells were lysed before sorting (details described in Methods). A summary list of the cell surface markers for each harvested cell population is included in Methods. The antibodies used are shown in Supplementary Table 3.

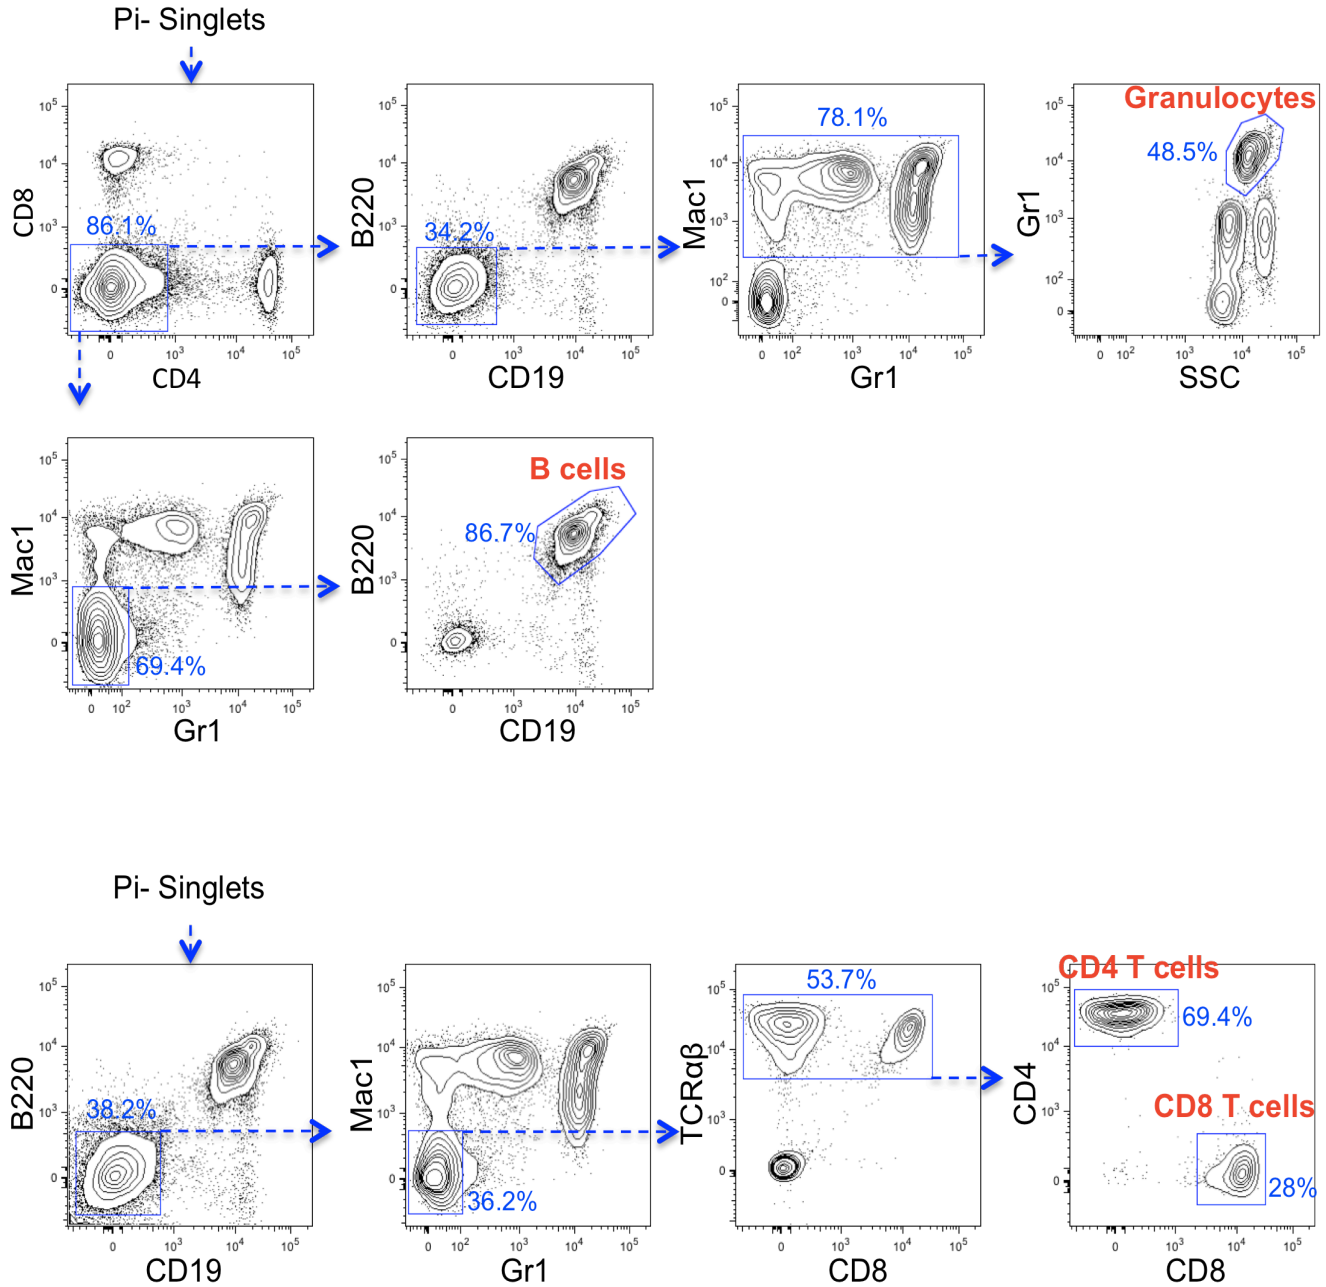

**Supplementary Figure 6** Gating for hematopoietic progenitor populations harvested from bone marrow. The harvested HSCs and six additional progenitor cells are labeled in red. Bone marrow cells were enriched by ckit and IL7R $\alpha$  (details described in Methods). A summary list of the cell surface markers for each harvested cell population is included in Methods. The antibodies used for sorting are shown in Supplementary Table 3.

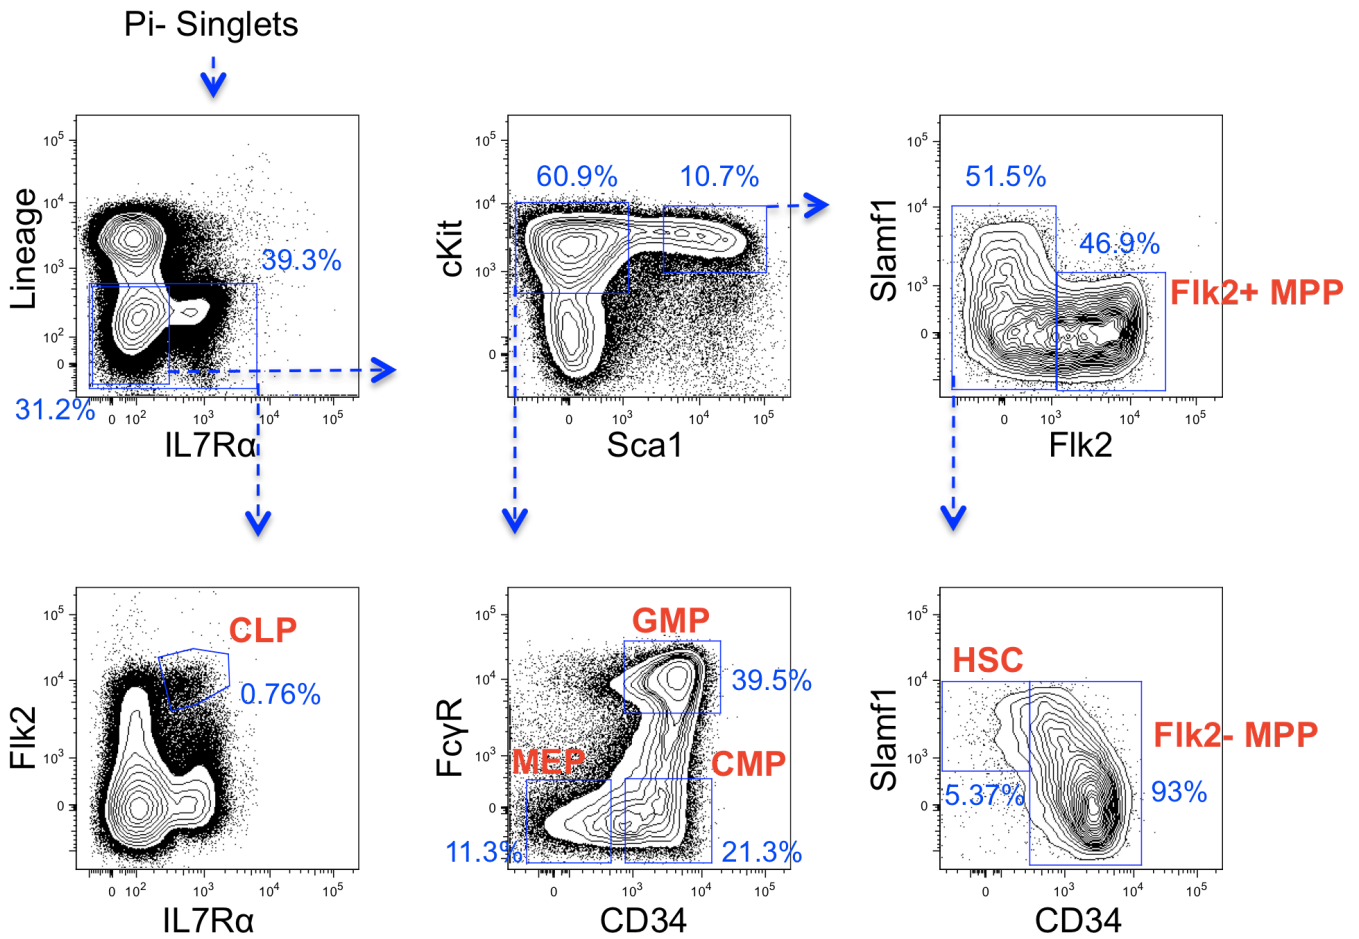

**Supplementary Figure 7** Lineage bias of HSC differentiation after irradiation. Triangle plots show the relative proportion of barcodes in granulocytes (Gr), B cells (B) and CD4+ T cells (CD4T) (Fig. 4). Each dot within the triangle represents a distinct barcode. Bigger and darker dots represent more abundant barcodes. The distance of a dot to the three vertices of the triangle is inversely correlated with the relative abundance of the barcode in the corresponding cell populations. For example, if a barcode is only found in one cell population, the dot is plotted at the corresponding vertex; if a barcode appears equally in all three populations, the dot is plotted in the middle of the triangle. Each triangle depicts a single mouse transplanted with 9000 donor HSCs after lethal irradiation. Blood cells were harvested 22 weeks after transplantation. Distinct barcode groups are highlighted by blue and orange ellipses.

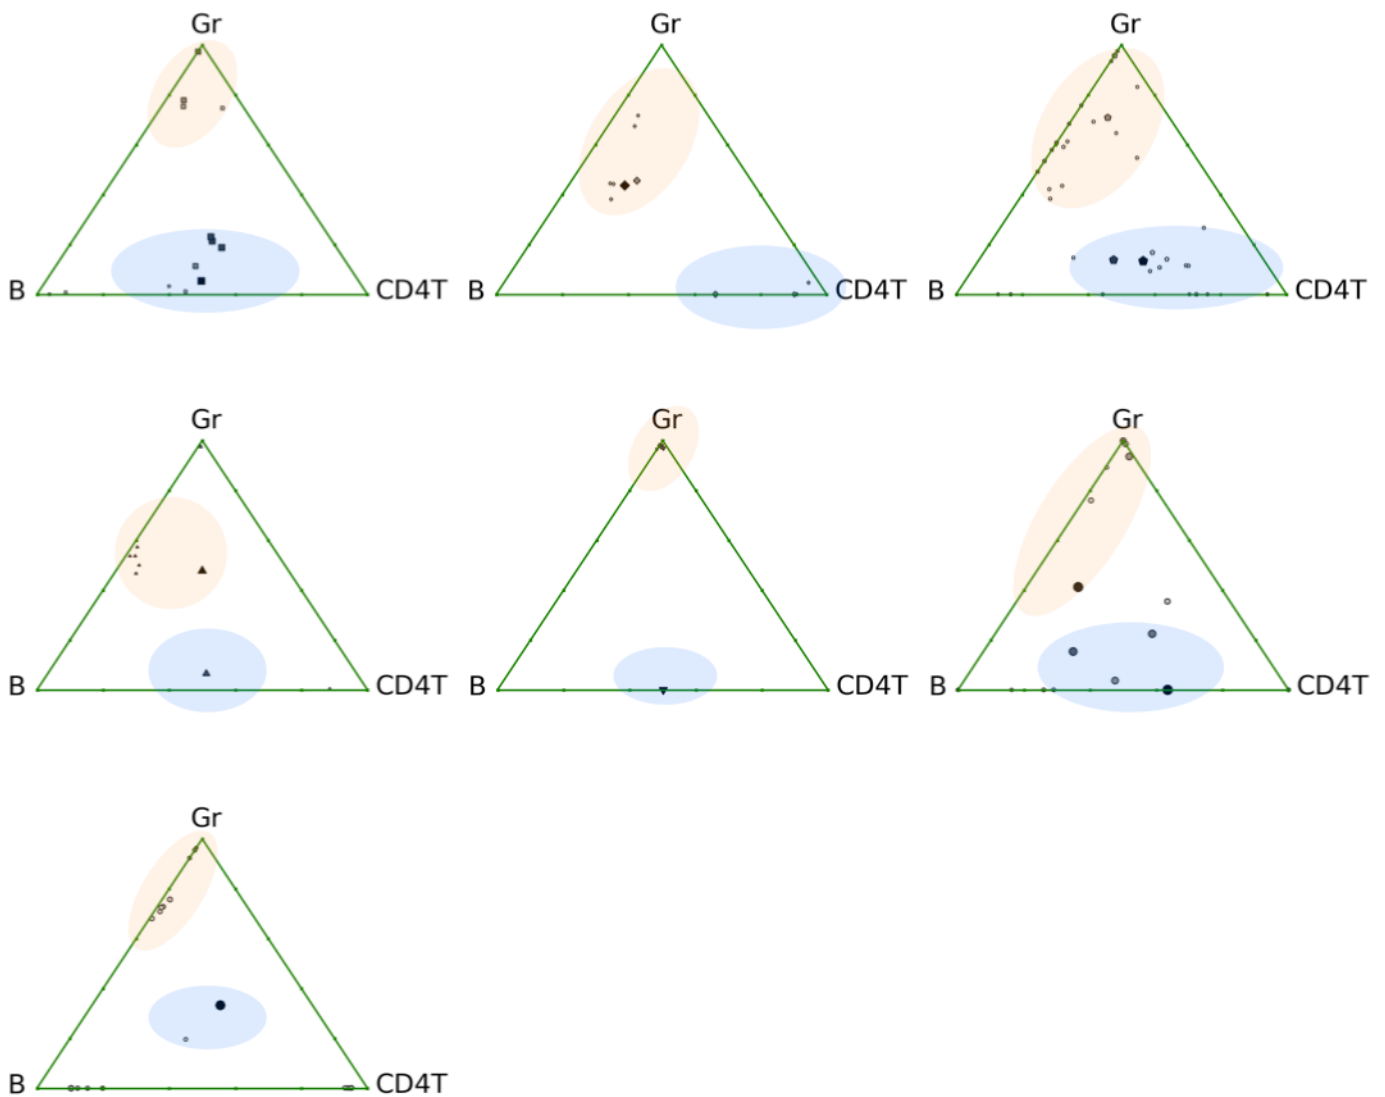

## SUPPLEMENTARY TABLES

**Supplementary Table 1** Library ID sequences. Every 33bp barcode begins with a 6bp library ID as shown below. These library IDs help identify the barcode library of origin. They also allow several experiments using different barcode libraries to be combined in a single sequencing run.

| Virus # | Library ID |
|---------|------------|
| 1       | GATCTG     |
| 2       | TCAAGT     |
| 3       | CTGATC     |
| 4       | AAGCTA     |
| 5       | GTAGCC     |
| 6       | TACAAG     |
| 7       | ATGACA     |
| 8       | AGCGGT     |
| 9       | ACTCAG     |
| 10      | TAACGT     |
| 11      | TGTTAC     |
| 12      | TCCGTA     |
| 13      | GAGTTC     |
| 14      | GTCGAG     |
| 15      | GCAACT     |
| 16      | CAGTGC     |
| 17      | CTTATG     |
| 18      | CGACCT     |



**Supplementary Table 2** Representation of single cells. Monte Carlo simulations were performed using experimentally derived data (Fig. 2a and Fig. 2b). We calculated the null hypothesis P values for different target cell population sizes such that more than 95% of the barcodes represent single cells (Fig. 2c). Shown are the maximum numbers of cells that can be used to ensure that with greater than 95% probability more than 95% of the barcodes represent single cells. Since the experimentally observed barcode library size is a lower bound of the actual size, the calculated cell population size is also a lower bound on the true size that can be used to ensure single cell representation.

| Virus #    | Total sequences | Number of barcodes | Maximum cell number | Probability of non-single-cell representation |
|------------|-----------------|--------------------|---------------------|-----------------------------------------------|
| virus # 1  | 589622          | 57581              | 810                 | 4.84%                                         |
| virus # 2  | 1905941         | 60083              | 1270                | 4.42%                                         |
| virus # 3  | 533253          | 52377              | 750                 | 4.70%                                         |
| virus # 4  | 651316          | 40807              | 540                 | 4.92%                                         |
| virus # 5  | 1218693         | 83089              | 1470                | 4.76%                                         |
| virus # 6  | 1398942         | 82694              | 1500                | 4.59%                                         |
| virus # 7  | 265727          | 16953              | 350                 | 4.68%                                         |
| virus # 8  | 236955          | 20102              | 400                 | 4.36%                                         |
| virus # 9  | 438632          | 35794              | 830                 | 4.88%                                         |
| virus # 10 | 444384          | 18344              | 370                 | 4.82%                                         |
| virus # 11 | 800268          | 48077              | 1130                | 4.62%                                         |
| virus # 12 | 888489          | 16161              | 320                 | 4.90%                                         |
| virus # 13 | 306101          | 44297              | 1000                | 4.57%                                         |
| virus # 14 | 293547          | 15562              | 280                 | 3.92%                                         |
| virus # 15 | 612777          | 57002              | 1340                | 4.76%                                         |
| virus # 16 | 242610          | 25301              | 530                 | 4.08%                                         |
| virus # 17 | 493350          | 28952              | 640                 | 4.16%                                         |
| virus # 18 | 682103          | 31032              | 660                 | 4.86%                                         |

**Supplementary Table 3** Monoclonal antibodies applied in this study.

(a) The following monoclonal antibodies were used for sorting donor HSCs:

| Antigen | Conjugation     | Vendor          | Catalog #  | Clone        | Lot #      |
|---------|-----------------|-----------------|------------|--------------|------------|
| B220    | Pacific Blue    | home conjugated |            | 6B2          |            |
| CD3     | Pacific Blue    | home conjugated |            | KT31.1       |            |
| CD34    | FITC            | ebioscience     | 11-0341-85 | RAM34        | E00265-195 |
| CD4     | Pacific Blue    | home conjugated |            | GK1.5        |            |
| CD8     | Pacific Blue    | home conjugated |            | 53-6.7       |            |
| Ckit    | APC-A 750       | ebioscience     | 27-1171-82 | 2B8          | E033660    |
| Flk2    | PE              | ebioscience     | 12-1351-83 | A2F10        | E026170    |
| Gr1     | Pacific Blue    | home conjugated |            | 8C5          |            |
| Mac1    | Pacific Blue    | home conjugated |            | M1/70        |            |
| Sca1    | PE-Cy7          | ebioscience     | 25-5981-82 | D7           | E030156    |
| Slamf1  | Alexa fluor 647 | biolegend       | 115918     | TC15-12F12.2 | B111222    |
| Ter119  | Pacific Blue    | home conjugated |            | Ter119       |            |

(b) The following monoclonal antibodies were used to harvest blood cells:

| Antigen           | Conjugation     | Vendor          | Catalog #  | Clone   | Lot #       |
|-------------------|-----------------|-----------------|------------|---------|-------------|
| B220              | Alexa Fluor 647 | ebioscience     | 51-0452-82 | RA3-6B2 | E08573-290  |
| CD19              | PE CY5-5        | ebioscience     | 35-0193-82 | eBio1D3 | E031334     |
| CD4               | Biotin          | home conjugated |            | GK1.5   |             |
| CD8               | PE-Cy5          | ebioscience     | 15-0081-83 | 53-6.7  | E026286     |
| Gr1               | e450            | ebioscience     | 48-5931-82 | RB6-8C5 | E10103-1207 |
| CD45.2            | PE-Cy7          | biolegend       | 109830     | 104     | B128067     |
| CD45.1            | Alexa Fluor 680 | home conjugated |            | A20.1.7 |             |
| Mac1              | APC-e780        | ebioscience     | 47-0112-82 | M1/70   | E10339-1357 |
| Streptavidin      | Qdot 605        | invitrogen      | Q10101MP   | n.a.    | 729527      |
| TCR $\alpha\beta$ | PE              | ebioscience     | 12-5961-83 | H57-597 | E01951-1628 |

(c) The following monoclonal antibodies were used to harvest progenitor cells in the bone marrow:

| Antigen       | Conjugation    | Vendor          | Catalog #  | Clone  | Lot #      |
|---------------|----------------|-----------------|------------|--------|------------|
| B220          | Pacific Orange | home conjugated |            | 6B2    |            |
| CD3           | Pacific Orange | home conjugated |            | KT31.1 |            |
| CD34          | A647           | ebioscience     | 51-0341-82 | RAM34  | E08567-165 |
| CD4           | Pacific Orange | home conjugated |            | GK1.5  |            |
| CD8           | Pacific Orange | home conjugated |            | 53-6.7 |            |
| Ckit          | APC-A750       | ebioscience     | 27-1171-82 | 2B8    | E033660    |
| Fc $\gamma$ R | Biotin         | ebioscience     | 13-0161-82 | 93     | E02430-161 |

|               |                |                 |            |         |             |
|---------------|----------------|-----------------|------------|---------|-------------|
| FIk2          | PE-Cy5         | ebioscience     | 15-1351-82 | A2F10   | E026568     |
| Gr1           | Pacific Orange | home conjugated |            | 8C5     |             |
| IL7R $\alpha$ | e450           | ebioscience     | 48-1271-82 | A7R34   | E10929-1095 |
| CD45.2        | A680           | home conjugated |            | AL1-4A2 |             |
| CD45.1        | PE Cy5-5       | ebioscience     | 35-0453-82 | A20     |             |
| Mac1          | Pacific Orange | home conjugated |            | M1/70   |             |
| Sca1          | PE-Cy7         | ebioscience     | 25-5981-82 | D7      | E030156     |
| Slanf1        | PE             | ebioscience     | 12-1501-80 | 9D1     | E020036     |
| Streptavidin  | Qdot 605       | invitrogen      | Q10101MP   | n.a.    | 729527      |
| Ter119        | Pacific Orange | home conjugated |            | Ter119  |             |

**Supplementary Table 4** Pearson correlation coefficients of barcode representations (copy numbers) between every two hematopoietic populations. M1-M7 refer to mouse #1-mouse #7. Cells were harvested at 22 weeks after lethal irradiation mediated transplantation. Abbreviations: hematopoietic stem cell (HSC), Flk2- multipotent progenitor (MPP-), Flk2+ multipotent progenitor (MPP+), granulocyte/monocytic progenitor (GMP), megakaryotic/erythroid progenitor (MEP), common lymphocyte progenitor (CLP), granulocyte (Gr), B cell (B), CD4 T cells (CD4T) and CD8 T cells (CD8T).

|      |         |          |          |          |          |          |          |          |          |          |
|------|---------|----------|----------|----------|----------|----------|----------|----------|----------|----------|
|      |         | B        | Gr       | CD4T     | MPP+     | CLP      | CD8T     | HSC      | MEP      | GMP      |
| MPP- | M 1     | -0.04358 | 0.204141 | -0.15721 | 0.4429   | 0.500613 | -0.16483 | 0.816008 | 0.415896 | 0.261053 |
| MPP- | M 2     | 0.130588 | 0.574309 | 0.201966 | 0.497514 | 0.504934 | 0.161223 | 0.431082 | 0.725771 | 0.71611  |
| MPP- | M 3     | 0.037741 | 0.13374  | -0.02558 | 0.007092 | 0.083607 | -0.03973 | 0.94736  | 0.160448 | 0.184216 |
| MPP- | M 4     | -0.30521 | 0.951969 | -0.30611 | 0.4391   | -0.29883 | -0.31283 | 0.91094  | -0.12119 | 0.199636 |
| MPP- | M 5     | 0.839805 | 0.915203 | 0.430158 | 0.898093 | 0.876153 | 0.238985 | 0.140705 | 0.921014 | 0.898179 |
| MPP- | M 6     | 0.35927  | 0.949004 | 0.292558 | 0.803683 | 0.756328 | 0.261334 | -0.05913 | 0.881404 | 0.847847 |
| MPP- | M 7     | 0.003464 | 0.167506 | 0.002584 | 0.704911 | 0.179613 | -0.00687 | 0.056732 | 0.313992 | 0.204161 |
|      | average | 0.146012 | 0.556553 | 0.062624 | 0.541899 | 0.371774 | 0.019612 | 0.463386 | 0.471048 | 0.473029 |
|      |         |          |          |          |          |          |          |          |          |          |
|      |         | MPP-     | Gr       | CD4T     | MPP+     | CLP      | CD8T     | HSC      | MEP      | GMP      |
| B    | M 1     | -0.04358 | 0.190943 | 0.765933 | 0.157182 | 0.157075 | 0.627561 | -0.17047 | 0.199689 | 0.207692 |
| B    | M 2     | 0.130588 | 0.143621 | 0.98082  | 0.559569 | 0.229755 | 0.989323 | 0.133688 | 0.394293 | 0.502624 |
| B    | M 3     | 0.037741 | 0.687201 | 0.991107 | 0.003974 | -0.06846 | 0.9682   | -0.06387 | -0.04023 | 0.180505 |
| B    | M 4     | -0.30521 | -0.23881 | 0.999992 | -0.13582 | 0.729414 | 0.999848 | -0.29754 | 0.185612 | 0.017937 |
| B    | M 5     | 0.839805 | 0.955512 | 0.695489 | 0.952512 | 0.957565 | 0.473744 | -0.11335 | 0.953043 | 0.958354 |
| B    | M 6     | 0.35927  | 0.444257 | 0.960541 | 0.635516 | 0.811722 | 0.947035 | -0.09059 | 0.583446 | 0.70229  |
| B    | M 7     | 0.003464 | 0.571111 | 0.542834 | 0.14749  | 0.623363 | 0.514123 | -0.13401 | 0.556791 | 0.625035 |
|      | average | 0.146012 | 0.393404 | 0.848102 | 0.331489 | 0.49149  | 0.788548 | -0.10516 | 0.404664 | 0.456348 |
|      |         |          |          |          |          |          |          |          |          |          |
|      |         | MPP-     | B        | CD4T     | MPP+     | CLP      | CD8T     | HSC      | MEP      | GMP      |
| Gr   | M 1     | 0.204141 | 0.190943 | 0.198656 | 0.77336  | 0.820365 | -0.06095 | -0.13827 | 0.864395 | 0.893742 |
| Gr   | M 2     | 0.574309 | 0.143621 | 0.113983 | 0.329383 | 0.396084 | 0.108154 | -0.14175 | 0.62031  | 0.623211 |
| Gr   | M 3     | 0.13374  | 0.687201 | 0.659808 | 0.075694 | -0.05473 | 0.572907 | -0.04348 | -0.03432 | 0.268827 |
| Gr   | M 4     | 0.951969 | -0.23881 | -0.23945 | 0.452566 | -0.24247 | -0.24568 | 0.874354 | -0.14901 | 0.083942 |
| Gr   | M 5     | 0.915203 | 0.955512 | 0.501527 | 0.993639 | 0.994351 | 0.275297 | -0.05672 | 0.998663 | 0.999016 |
| Gr   | M 6     | 0.949004 | 0.444257 | 0.354461 | 0.907646 | 0.839236 | 0.311746 | 0.040668 | 0.947192 | 0.910083 |
| Gr   | M 7     | 0.167506 | 0.571111 | 0.536925 | 0.333314 | 0.809845 | 0.476723 | -0.10899 | 0.822394 | 0.809821 |
|      | average | 0.556553 | 0.393404 | 0.303701 | 0.552229 | 0.508955 | 0.205457 | 0.060831 | 0.581375 | 0.65552  |
|      |         |          |          |          |          |          |          |          |          |          |
|      |         | MPP-     | B        | Gr       | MPP+     | CLP      | CD8T     | HSC      | MEP      | GMP      |
| CD4T | M 1     | -0.15721 | 0.765933 | 0.198656 | 0.119916 | 0.094496 | 0.765171 | -0.22658 | 0.13991  | 0.165414 |



|     |         | MPP-     | B        | Gr       | CD4T     | MPP+      | CLP      | CD8T     | MEP      | GMP      |
|-----|---------|----------|----------|----------|----------|-----------|----------|----------|----------|----------|
| HSC | M 1     | 0.816008 | -0.17047 | -0.13827 | -0.22658 | 0.194054  | 0.234389 | -0.10332 | 0.131918 | -0.09343 |
| HSC | M 2     | 0.431082 | 0.133688 | -0.14175 | 0.201597 | 0.127773  | -0.04145 | 0.167954 | 0.1114   | 0.09872  |
| HSC | M 3     | 0.94736  | -0.06387 | -0.04348 | -0.12252 | -3.56E-05 | 0.056322 | -0.11988 | 0.122102 | 0.099791 |
| HSC | M 4     | 0.91094  | -0.29754 | 0.874354 | -0.29837 | 0.50101   | -0.1724  | -0.30395 | -0.02884 | 0.452154 |
| HSC | M 5     | 0.140705 | -0.11335 | -0.05672 | -0.19341 | -0.0399   | -0.06836 | -0.19176 | -0.07143 | -0.08538 |
| HSC | M 6     | -0.05913 | -0.09059 | 0.040668 | -0.19542 | -0.1556   | -0.15884 | -0.21947 | -0.14707 | -0.1624  |
| HSC | M 7     | 0.056732 | -0.13401 | -0.10899 | -0.13225 | -0.17244  | -0.05466 | -0.14793 | -0.07474 | -0.03339 |
|     | average | 0.463386 | -0.10516 | 0.060831 | -0.13814 | 0.06498   | -0.02929 | -0.13119 | 0.006191 | 0.039438 |
|     |         |          |          |          |          |           |          |          |          |          |
|     |         | MPP-     | B        | Gr       | CD4T     | MPP+      | CLP      | CD8T     | HSC      | GMP      |
| MEP | M 1     | 0.415896 | 0.199689 | 0.864395 | 0.13991  | 0.952458  | 0.986488 | -0.07193 | 0.131918 | 0.960612 |
| MEP | M 2     | 0.725771 | 0.394293 | 0.62031  | 0.495671 | 0.877871  | 0.778421 | 0.457236 | 0.1114   | 0.977891 |
| MEP | M 3     | 0.160448 | -0.04023 | -0.03432 | -0.04139 | 0.28671   | 0.952507 | 0.037543 | 0.122102 | 0.94702  |
| MEP | M 4     | -0.12119 | 0.185612 | -0.14901 | 0.188332 | 0.62804   | 0.525799 | 0.191159 | -0.02884 | 0.48843  |
| MEP | M 5     | 0.921014 | 0.953043 | 0.998663 | 0.503459 | 0.994722  | 0.992609 | 0.277934 | -0.07143 | 0.997687 |
| MEP | M 6     | 0.881404 | 0.583446 | 0.947192 | 0.510823 | 0.980524  | 0.93626  | 0.468229 | -0.14707 | 0.974415 |
| MEP | M 7     | 0.313992 | 0.556791 | 0.822394 | 0.613732 | 0.591198  | 0.951638 | 0.547418 | -0.07474 | 0.973402 |
|     | average | 0.471048 | 0.404664 | 0.581375 | 0.344362 | 0.758789  | 0.874817 | 0.272513 | 0.006191 | 0.90278  |
|     |         |          |          |          |          |           |          |          |          |          |
|     |         | MPP-     | B        | Gr       | CD4T     | MPP+      | CLP      | CD8T     | HSC      | MEP      |
| GMP | M 1     | 0.261053 | 0.207692 | 0.893742 | 0.165414 | 0.921361  | 0.929621 | -0.06878 | -0.09343 | 0.960612 |
| GMP | M 2     | 0.71611  | 0.502624 | 0.623211 | 0.582412 | 0.855337  | 0.720646 | 0.553761 | 0.09872  | 0.977891 |
| GMP | M 3     | 0.184216 | 0.180505 | 0.268827 | 0.171077 | 0.37494   | 0.914643 | 0.221867 | 0.099791 | 0.94702  |
| GMP | M 4     | 0.199636 | 0.017937 | 0.083942 | 0.018652 | 0.454211  | 0.292532 | 0.018212 | 0.452154 | 0.48843  |
| GMP | M 5     | 0.898179 | 0.958354 | 0.999016 | 0.505772 | 0.994503  | 0.997071 | 0.278209 | -0.08538 | 0.997687 |
| GMP | M 6     | 0.847847 | 0.70229  | 0.910083 | 0.660172 | 0.96983   | 0.981849 | 0.617017 | -0.1624  | 0.974415 |
| GMP | M 7     | 0.204161 | 0.625035 | 0.809821 | 0.708851 | 0.523626  | 0.982786 | 0.641777 | -0.03339 | 0.973402 |
|     | average | 0.473029 | 0.456348 | 0.65552  | 0.401764 | 0.727687  | 0.831307 | 0.323152 | 0.039438 | 0.90278  |
